# Supplementary material
Source: MDPI journal article supplement (https://www.mdpi.com/2304-6740/12/3/82)
Supplement: s1 [file s1]

**Supporting Information for:**

**Understanding the Selective Extraction of the Uranyl Ion  
from Seawater with Amidoxime-Functionalized  
Materials: Uranyl Complexes of Pyrimidine-2-amidoxime**  
†

**Sokratis T. Tsantis <sup>1,2,\*</sup>, Zoi G. Lada <sup>1,2</sup>, Sotiris G. Skiadas <sup>1</sup>, Demetrios I. Tzimopoulos <sup>3</sup>, Catherine P.  
Raptopoulou <sup>4</sup>, Vassilis Psycharis <sup>4,\*</sup> and Spyros P. Perlepes <sup>1,2,\*</sup>**

<sup>1</sup> Department of Chemistry, University of Patras, 26504 Patras, Greece; zoilada@iceht.forth.gr (Z.G.L.); up1055861@ac.upatras.gr (S.G.S.)

<sup>2</sup> Institute of Chemical Engineering Sciences (ICE-HT), Foundation for Research and Technology-Hellas (FORTH), Platani, P.O. Box 144, 26504 Patras, Greece

<sup>3</sup> Department of Chemistry, Aristotle University of Thessaloniki, 54124 Thessaloniki, Greece; dimtzim@auth.gr

<sup>4</sup> Institute of Nanoscience and Nanotechnology, NCSR “Demokritos”, 15310 Aghia Paraskevi Attikis, Greece; c.raptopoulou@inn.demokritos.gr

\* Correspondence: tsantis@iceht.forth.gr (S.T.T.); v.psycharis@inn.demokritos.gr (V.P.); perlepes@upatras.gr (S.P.P.)

† Dedicated to Professor Albert Escuer for His Contributions to Inorganic Chemistry: A Great Scientist and a Precious Friend.

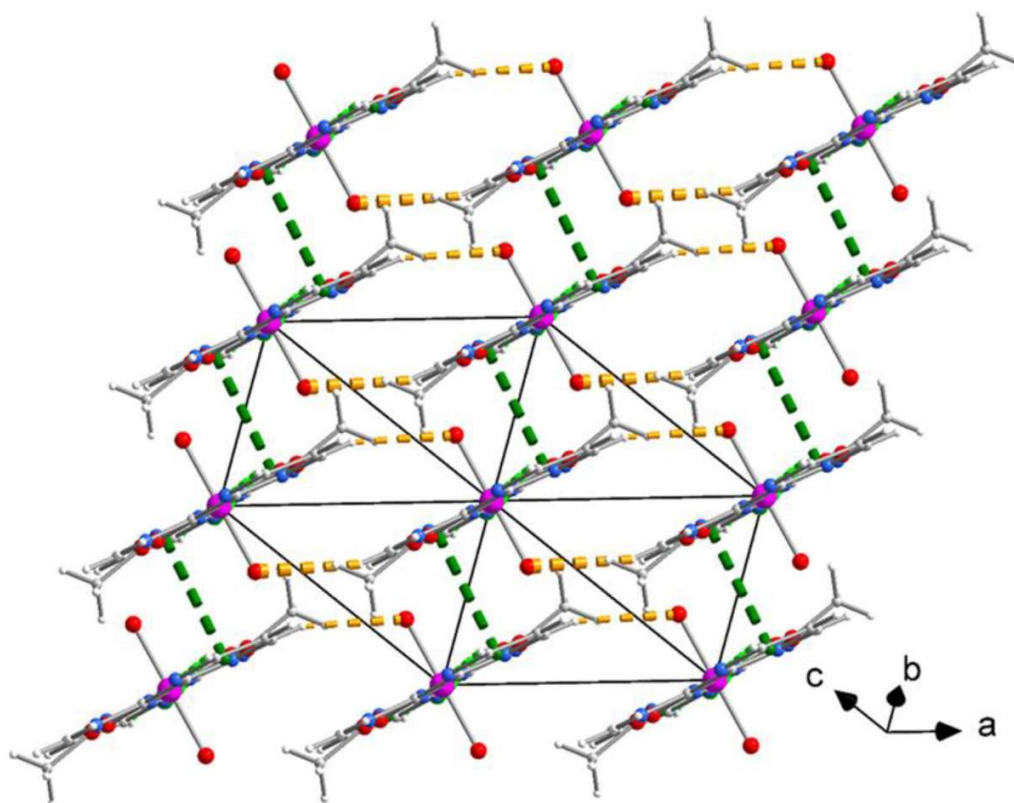

**Figure S1.** The packing of molecules in the crystal structure of  $[\text{UO}_2(\text{pmadH})_2(\text{MeOH})_2]$  (**1**), viewed along the  $[1,-1,1]$  direction. Dashed light green, dark green and orange lines represent  $\text{C5-H(C5)}\cdots\text{N3}$  hydrogen bonds,  $\pi$ - $\pi$  stacking interactions and  $\text{C3-H(C3)}\cdots\text{O3}$  hydrogen-bonding interactions, respectively. For metric parameters, see Table 3.

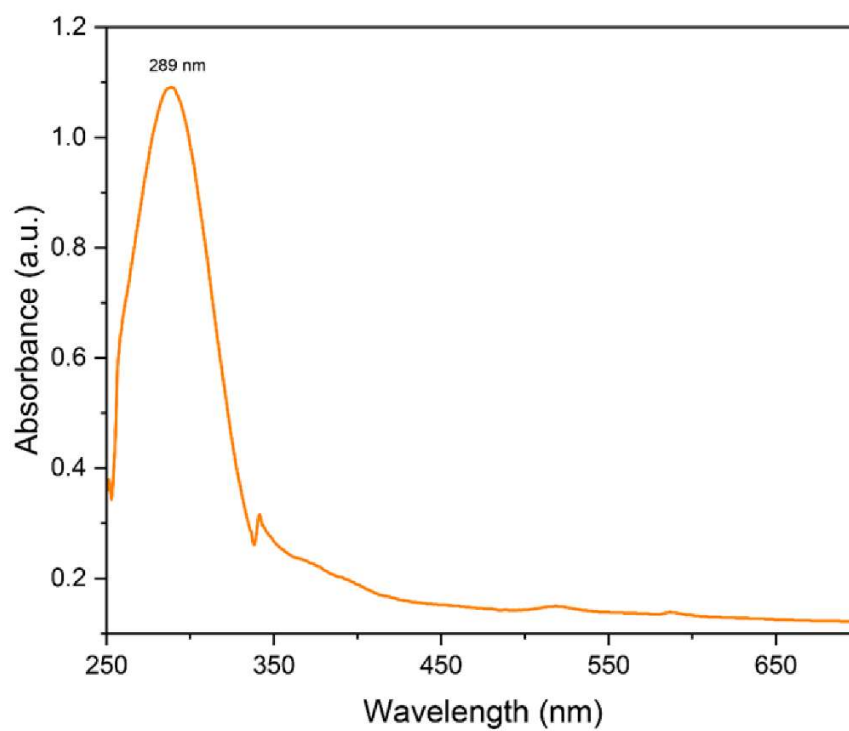

**Figure S2.** The UV/Vis spectrum of  $[\text{UO}_2(\text{pmadH})_2(\text{MeOH})_2]$  (**1**) in DMSO. The 340 nm peak is a ghost peak due to the instrument used.

---

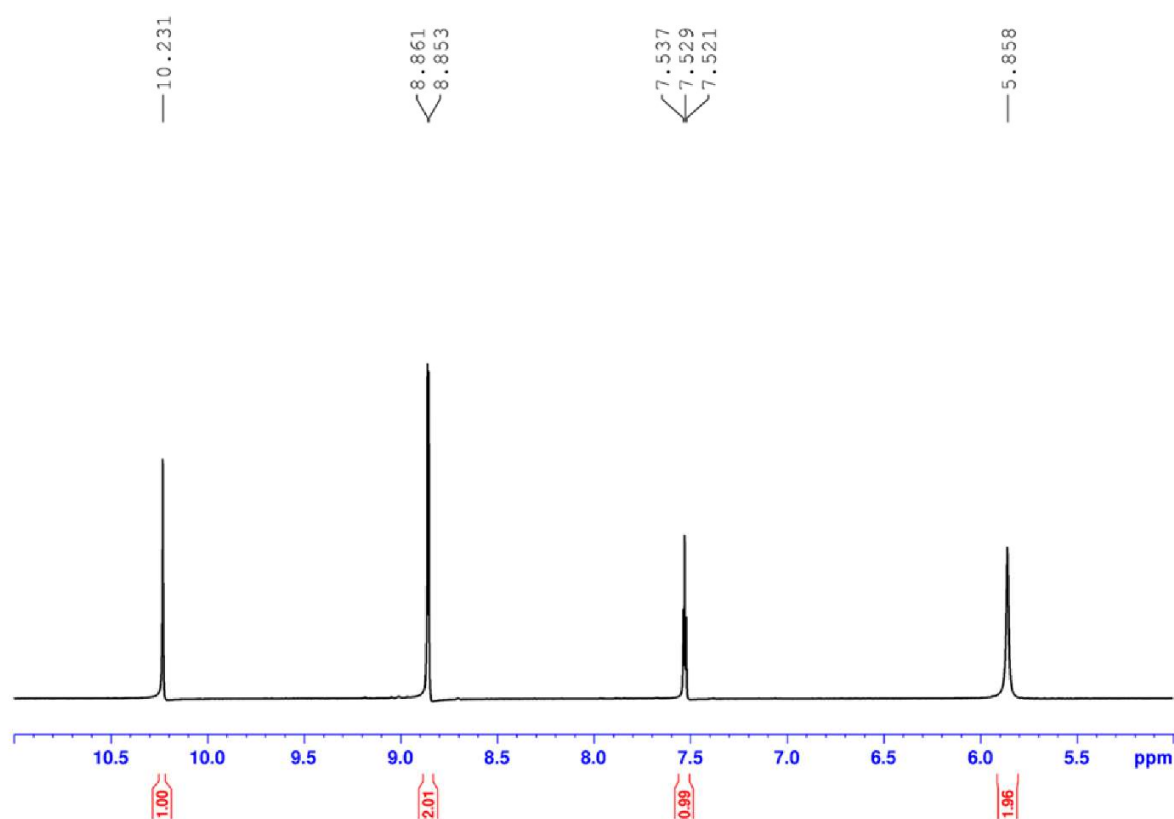

**Figure S3.** The  $^1\text{H}$  NMR spectrum of free pmadH<sub>2</sub> in d<sub>6</sub>-DMSO in the  $\delta$  11.00-5.00 ppm region.

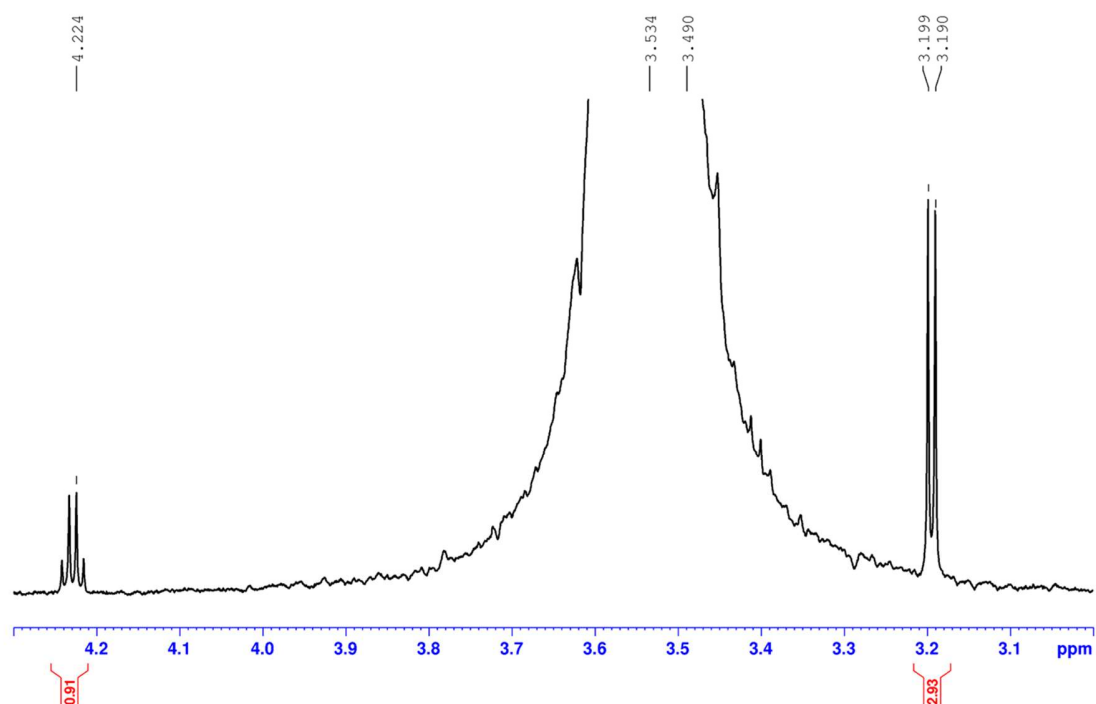

**Figure S4.** A part of the  $^1\text{H}$  NMR spectrum of  $[\text{UO}_2(\text{pmadH})_2(\text{MeOH})_2]$  (**1**) in  $\text{d}_6$ -DMSO showing the MeOH protons. The signal at  $\delta \sim 3.5$  ppm is due to the protons of the  $\text{H}_2\text{O}$  content of the deuterated solvent and to the coordinated hydroxide protons (see text for discussions), see Eqs. (4)-(6) of the main body of the ms.
